# Supplementary figures and images for: Differentially-Expressed miRNAs in Ectopic Stromal Cells Contribute to Endometriosis Development: The Plausible Role of miR-139-5p and miR-375
Source: MDPI journal article supplement (doi:10.3390/ijms19123789), 2018-11-28

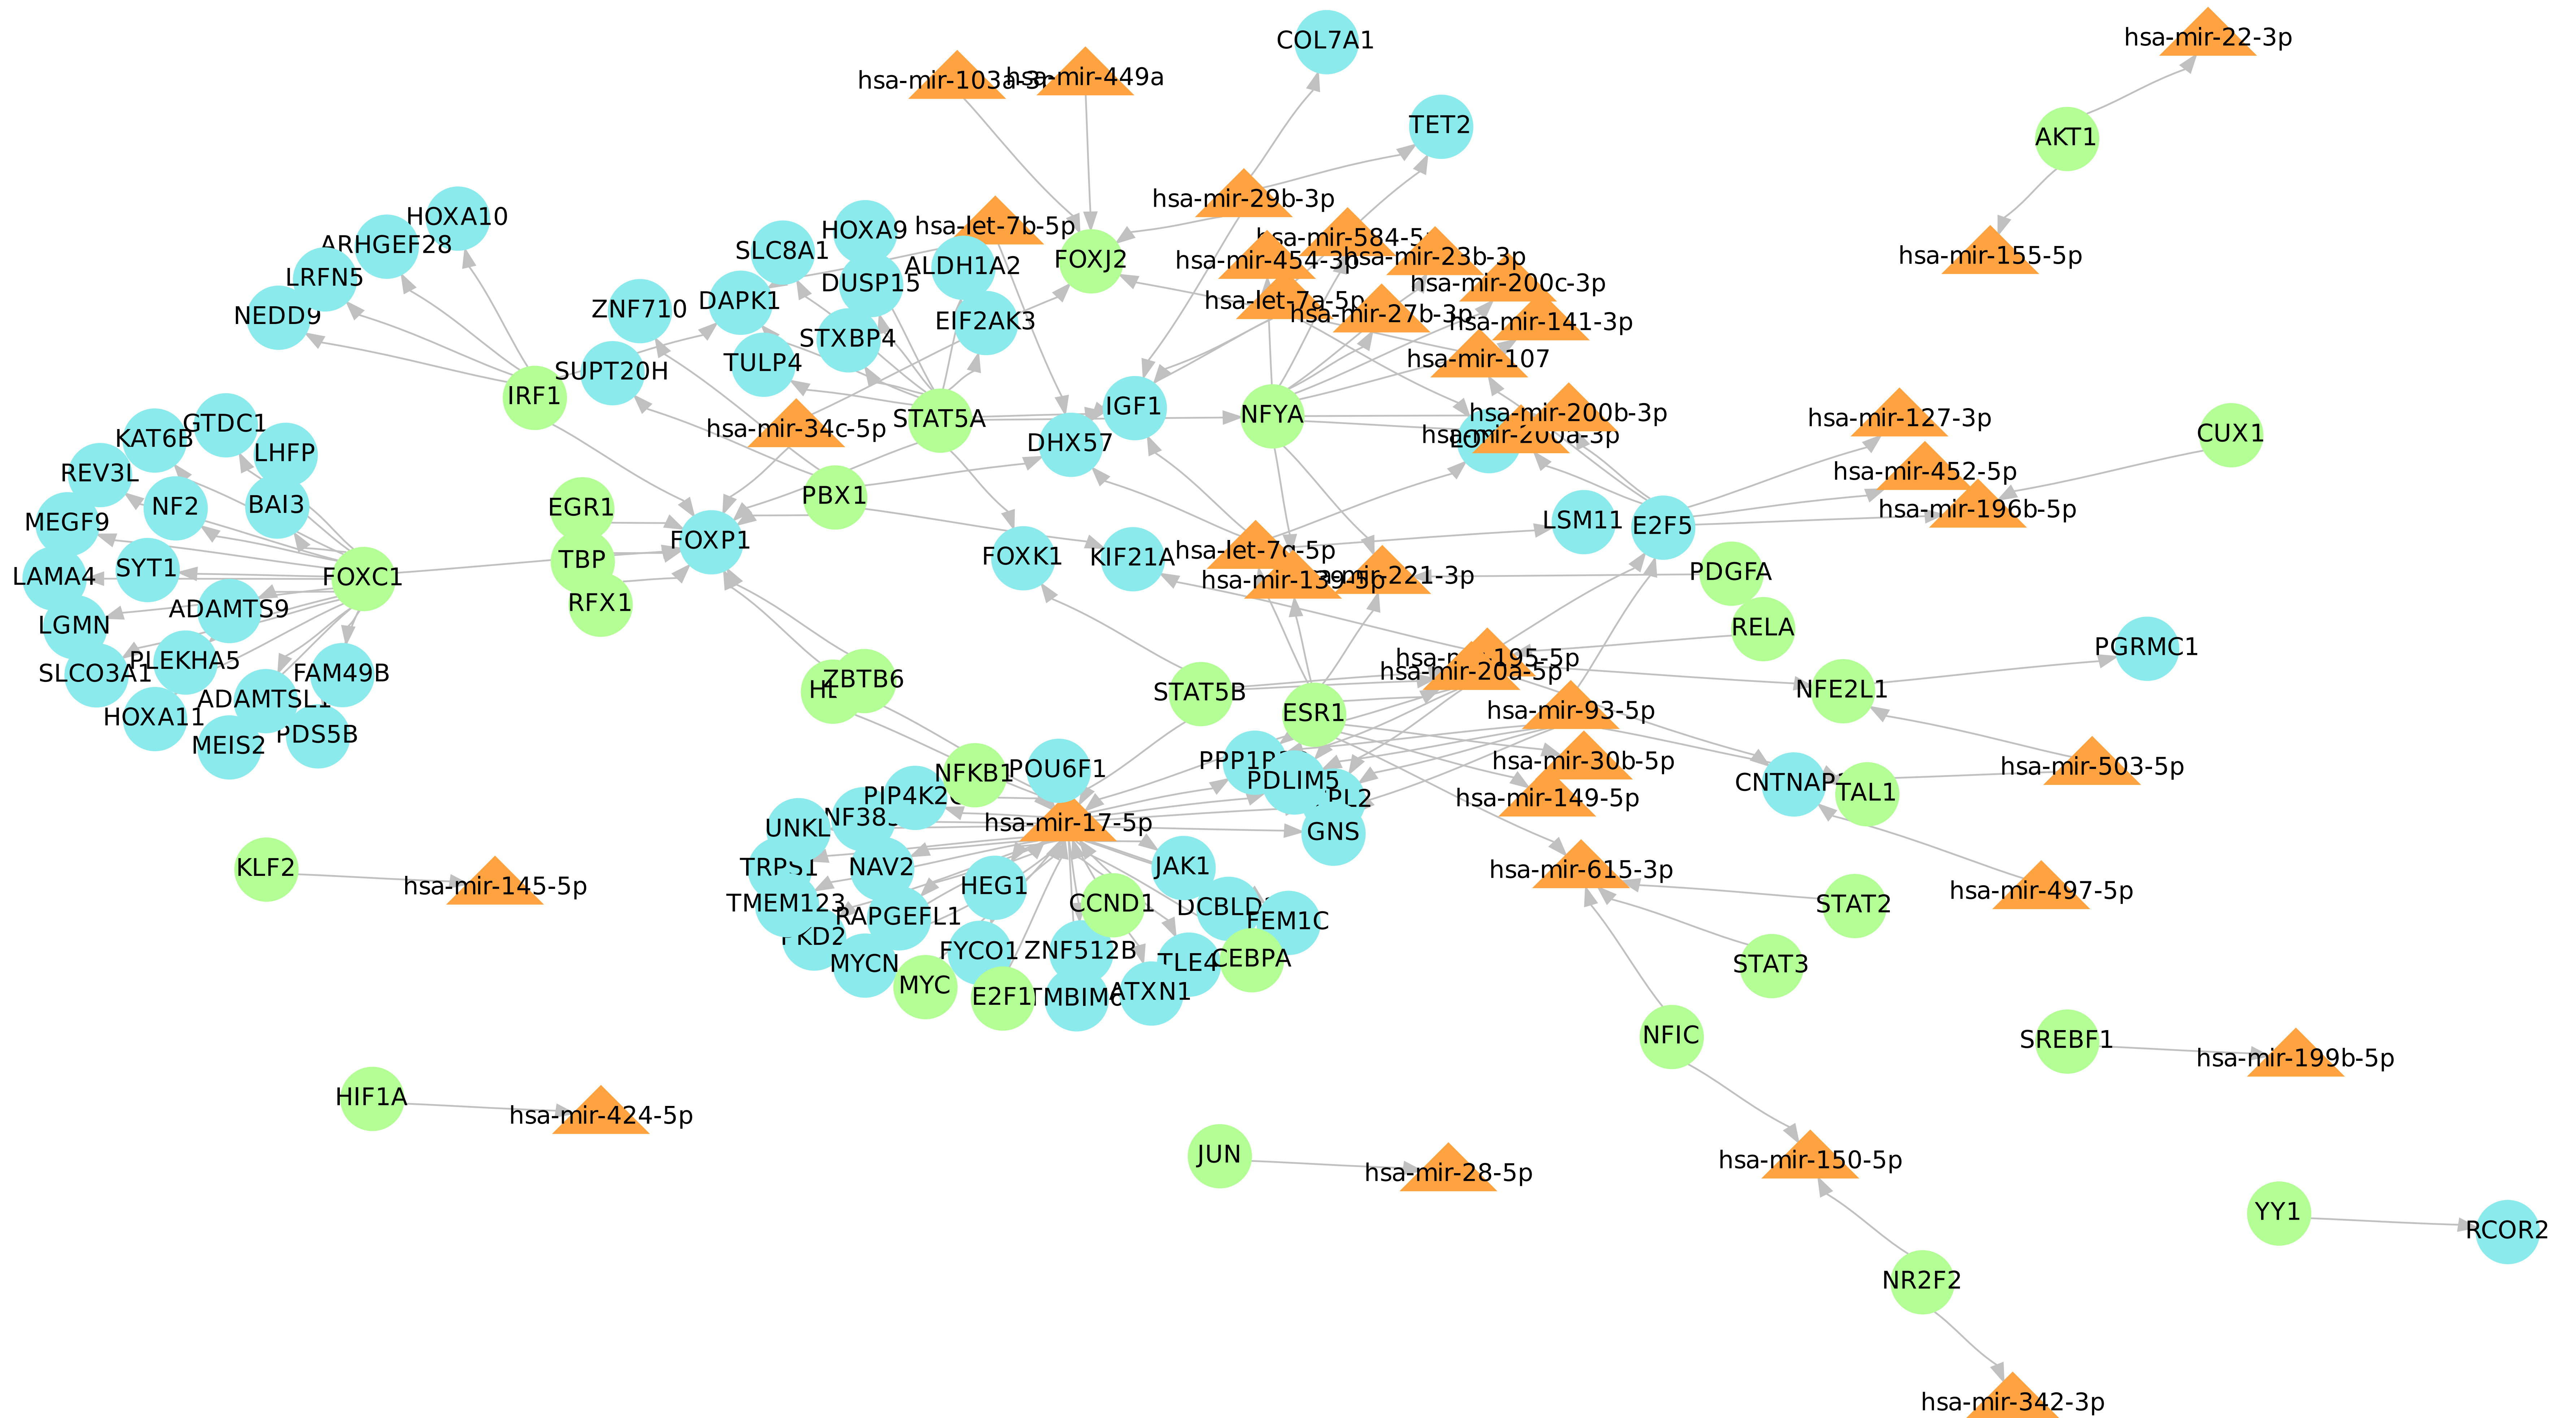

Supplement: s1 [file s1]
